# Supplementary material for: One-pot synthesis of unsubstituted and methyl substituted-pyrazinyl diselenides and monoselenides: structural, optical property characterization and DFT calculations
Source: Royal Society of Chemistry journal article supplement (doi:10.1039/d3ra06591j), 2023-01-01
Supplement: d3ra06591j1.pdf [file d3ra06591j1.pdf]

## One-pot Synthesis of unsubstituted- and methyl substituted-Pyrazinyl Diselenides and Monoselenides: Structural, Optical Property Characterization and DFT Calculations

Nisha Kushwah,<sup>a\*</sup> Suresh Chopade,<sup>a</sup> Amey Wadawale,<sup>a</sup> P. B. Sharma<sup>a</sup> and G. Kedarnath<sup>a,b\*</sup>

**Scheme 1** Synthesis of methyl substituted-dipyrazinyldiselenide and -monoselenide with numbering.

**Fig S1.** IR spectra of Bis(2-pyrazinyl)selenide [(2-pyz)<sub>2</sub>Se] (**1**)

**Fig S2.** IR spectra of Bis(2-pyrazinyl)diselenide [(2-pyzSe)<sub>2</sub>] (**2**)

**Fig S3.** IR spectra of Bis(2,5-dimethyl-3-pyrazinyl)selenide [(2,5-Me<sub>2</sub>-3-pyz)<sub>2</sub>Se] (**3**)

**Fig S4.** IR spectra of Bis(2,5-dimethyl-3-pyrazinyl)diselenide [(2,5-Me<sub>2</sub>-3-pyzSe)<sub>2</sub>] (**4**)

**Fig S5.** <sup>1</sup>H NMR spectra of bis(2-pyrazinyl)selenide [(2-pyz)<sub>2</sub>Se] (**1**)

**Fig S6.** <sup>13</sup>C{<sup>1</sup>H} NMR spectra of Bis(2-pyrazinyl)selenide [(2-pyz)<sub>2</sub>Se] (**1**)

**Fig S7.** <sup>77</sup>Se{<sup>1</sup>H} NMR spectra of Bis(2-pyrazinyl)selenide [(2-pyz)<sub>2</sub>Se] (**1**)

**Fig S8.** <sup>1</sup>H NMR spectra of Bis(2-pyrazinyl)diselenide [(2-pyzSe)<sub>2</sub>] (**2**)

**Fig S9.** <sup>13</sup>C{<sup>1</sup>H} NMR spectra of bis(2-pyrazinyl)diselenide [(2-pyzSe)<sub>2</sub>] (**2**)

**Fig S10.** <sup>77</sup>Se{<sup>1</sup>H} NMR spectra of bis(2-pyrazinyl)diselenide [(2-pyzSe)<sub>2</sub>] (**2**)

**Fig S11.** <sup>1</sup>H NMR spectra of bis(2,5-dimethyl-3-pyrazinyl)selenide [(2,5-Me<sub>2</sub>-3-pyz)<sub>2</sub>Se] (**3**)

**Fig S12.** <sup>13</sup>C{<sup>1</sup>H} NMR spectra of Bis(2,5-dimethyl-3-pyrazinyl)selenide [(2,5-Me<sub>2</sub>-3-pyz)<sub>2</sub>Se] (**3**)

**Fig S13.** <sup>77</sup>Se{<sup>1</sup>H} NMR spectra of Bis(2,5-dimethyl-3-pyrazinyl)selenide [(2,5-Me<sub>2</sub>-3-pyz)<sub>2</sub>Se]

**Fig S14.** <sup>1</sup>H NMR spectra of Bis(2,5-dimethyl-3-pyrazinyl)diselenide [(2,5-Me<sub>2</sub>-3-pyzSe)<sub>2</sub>] (**4**)

**Fig S15.** <sup>13</sup>C{<sup>1</sup>H} NMR spectra of Bis(2,5-dimethyl-3-pyrazinyl)diselenide [(2,5-Me<sub>2</sub>-3-pyzSe)<sub>2</sub>] (**4**)

**Fig S16.** <sup>77</sup>Se{<sup>1</sup>H} NMR spectra of Bis(2,5-dimethyl-3-pyrazinyl)diselenide [(2,5-Me<sub>2</sub>-3-pyzSe)<sub>2</sub>] (**4**)

**Fig S17:** Absorption-, excitation-, emission-spectra of [(3-Me-2-pySe)<sub>2</sub>].

**Fig S18:** Absorption-, excitation-, emission-spectra of [(4,6-Me<sub>2</sub>-2-pymSe)<sub>2</sub>].

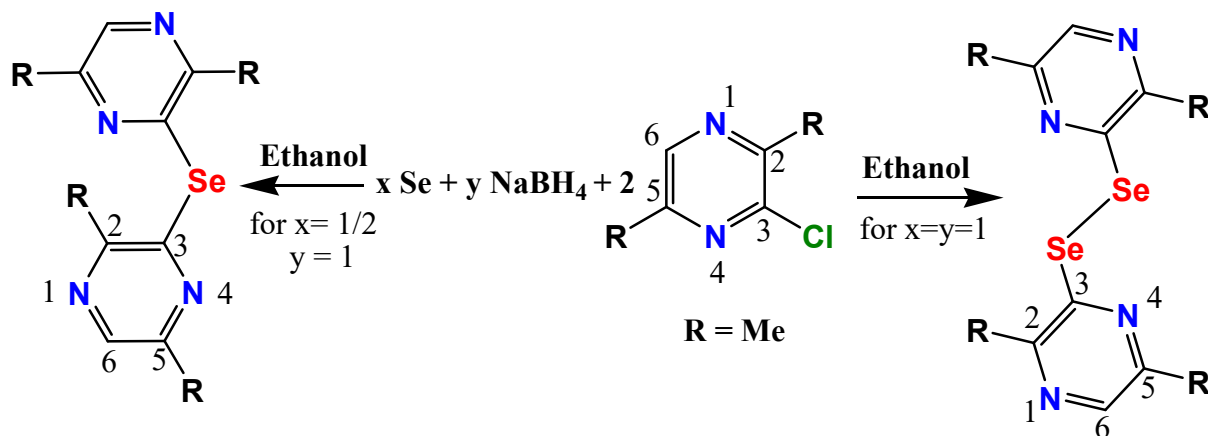

**Scheme 1** Synthesis of methyl substituted-dipyrazinyldiselenide and -monoselenide with numbering.

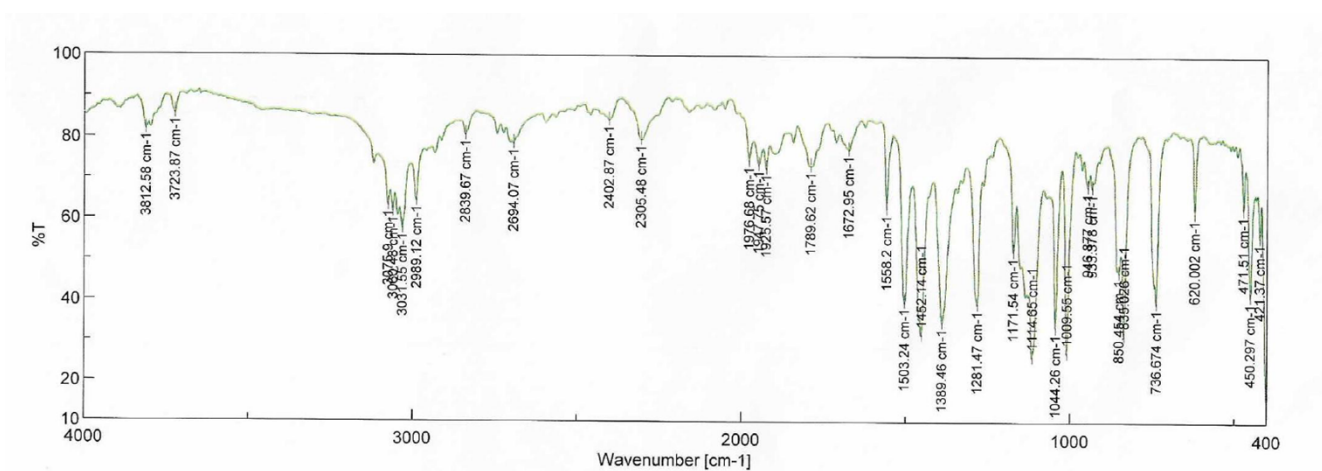

**Fig S1:** IR spectra of bis(2-pyrazinyl)selenide [(2-pyz)<sub>2</sub>Se] (1)

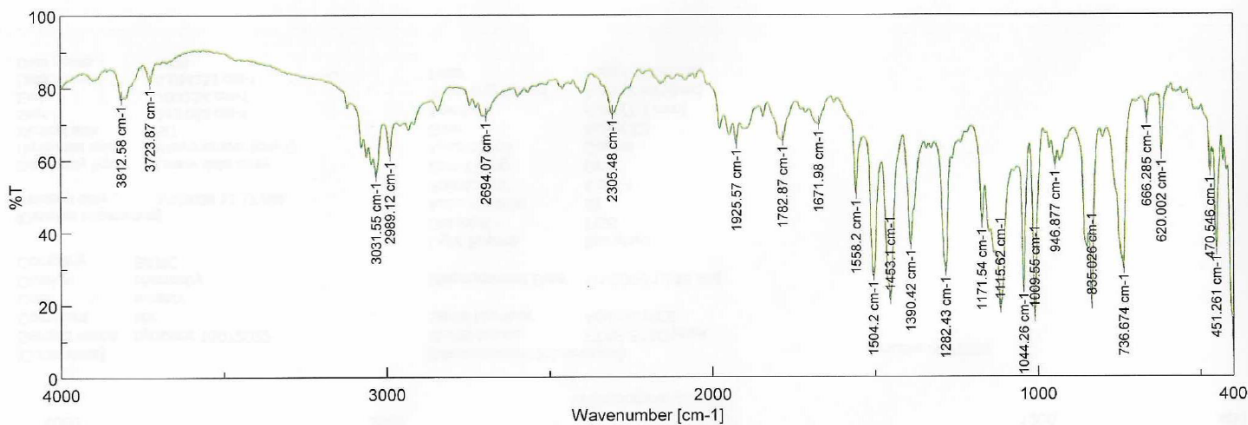

**Fig S2:** IR spectra of bis(2-pyrazinyl)diselenide [(2-pyzSe)<sub>2</sub>] (2)

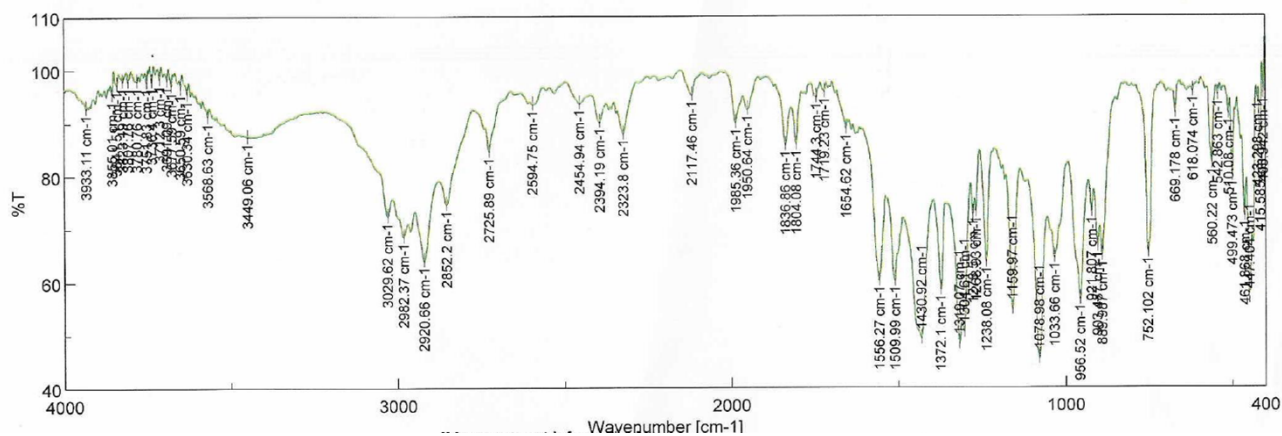

**Fig S3:** IR spectra of bis(2,5-dimethyl-3-pyrazinyl)selenide [(2,5-Me<sub>2</sub>-3-pyz)<sub>2</sub>Se] (3)

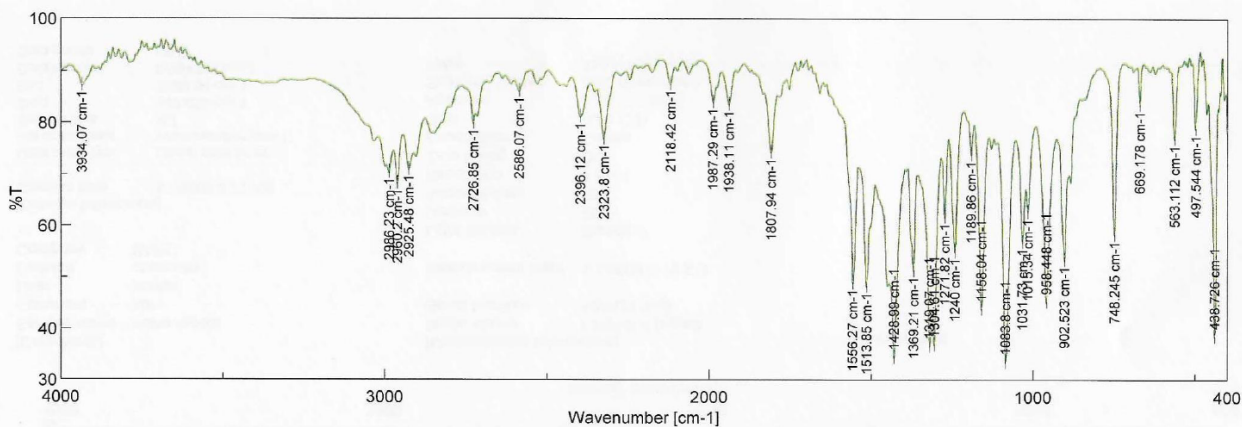

**Fig S4:** IR spectra of bis(2,5-dimethyl-3-pyrazinyl)diselenide [(2,5-Me<sub>2</sub>-3-pyzSe)<sub>2</sub>] (4)

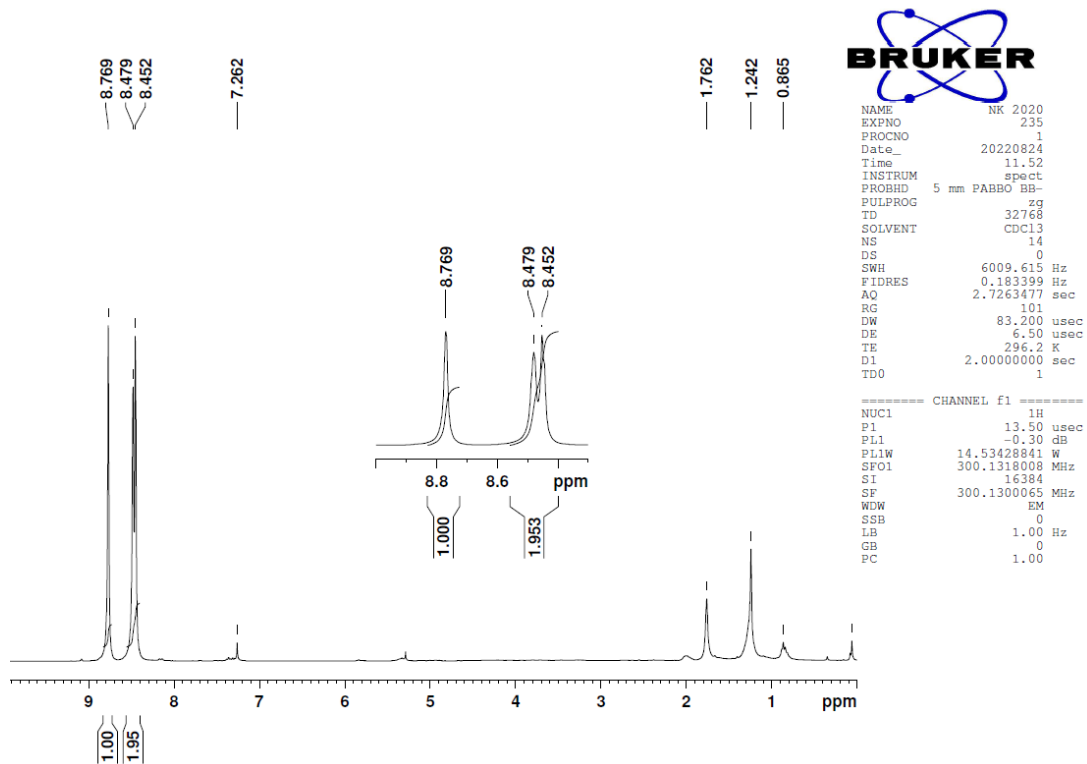

**Fig S5:**  $^1\text{H}$  NMR spectra of bis(2-pyrazinyl)selenide [(2-pyz) $_2$ Se] (**1**)

(Peaks at 0.86, 1.24 and 1.74 is due to solvent residual signals) Ref: G. R. Fulmer, A. J. M. Miller, N. H. Sherden, H. E. Gottlieb, A. Nudelman, B. M. Stoltz, J. E. Bercaw and K. I. Goldberg *Organometallics* **29**(2010) 2176–2179.

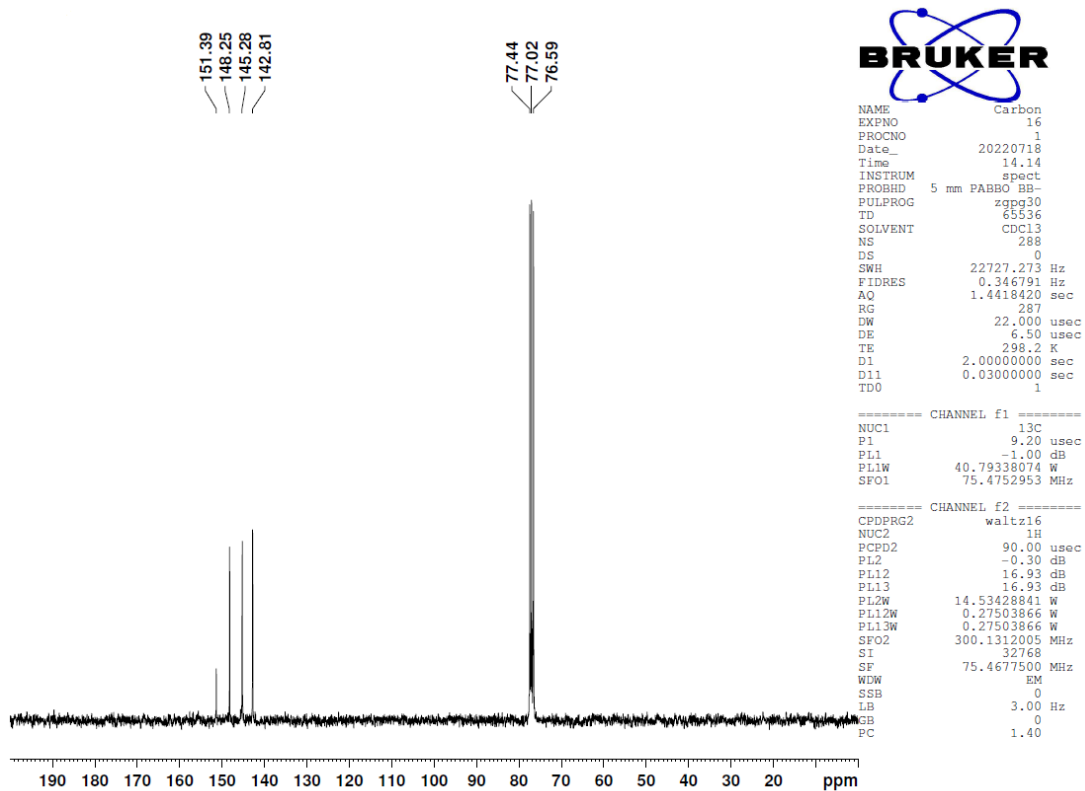

**Fig S6:**  $^{13}\text{C}\{^1\text{H}\}$  NMR spectra of Bis(2-pyrazinyl)selenide [(2-pyz) $_2$ Se] (1)

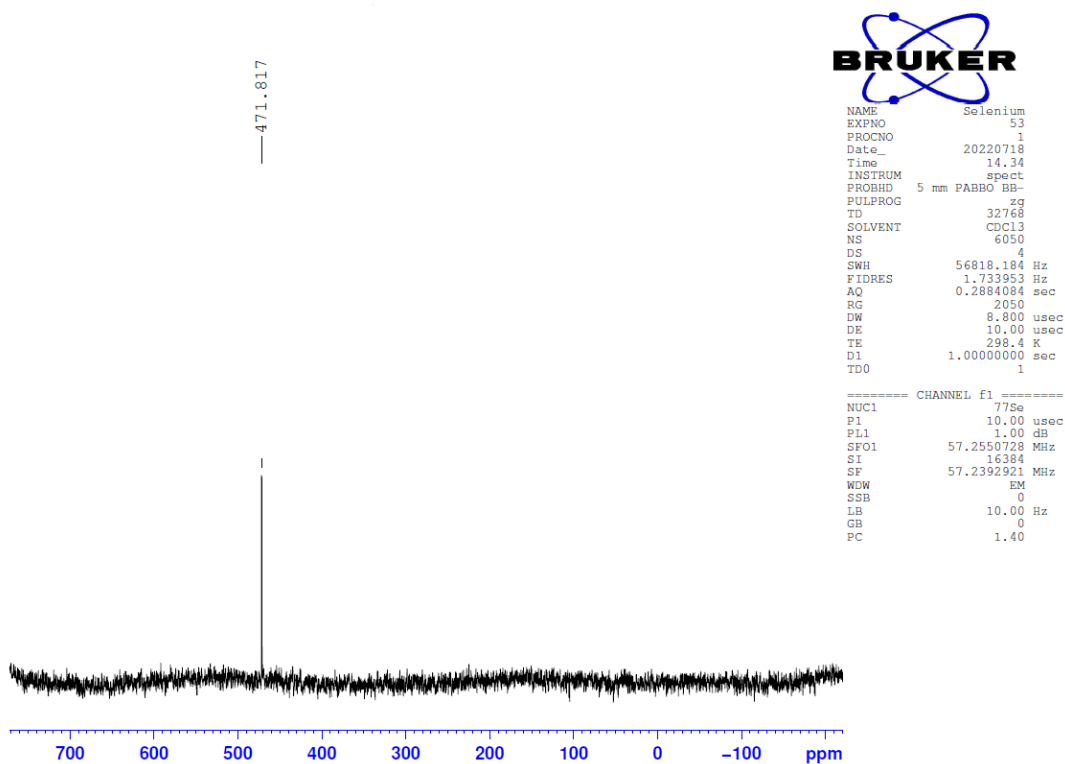

**Fig S7:**  $^{77}\text{Se}\{^1\text{H}\}$  NMR spectra of bis(2-pyrazinyl)selenide [(2-pyz) $_2$ Se] (1)

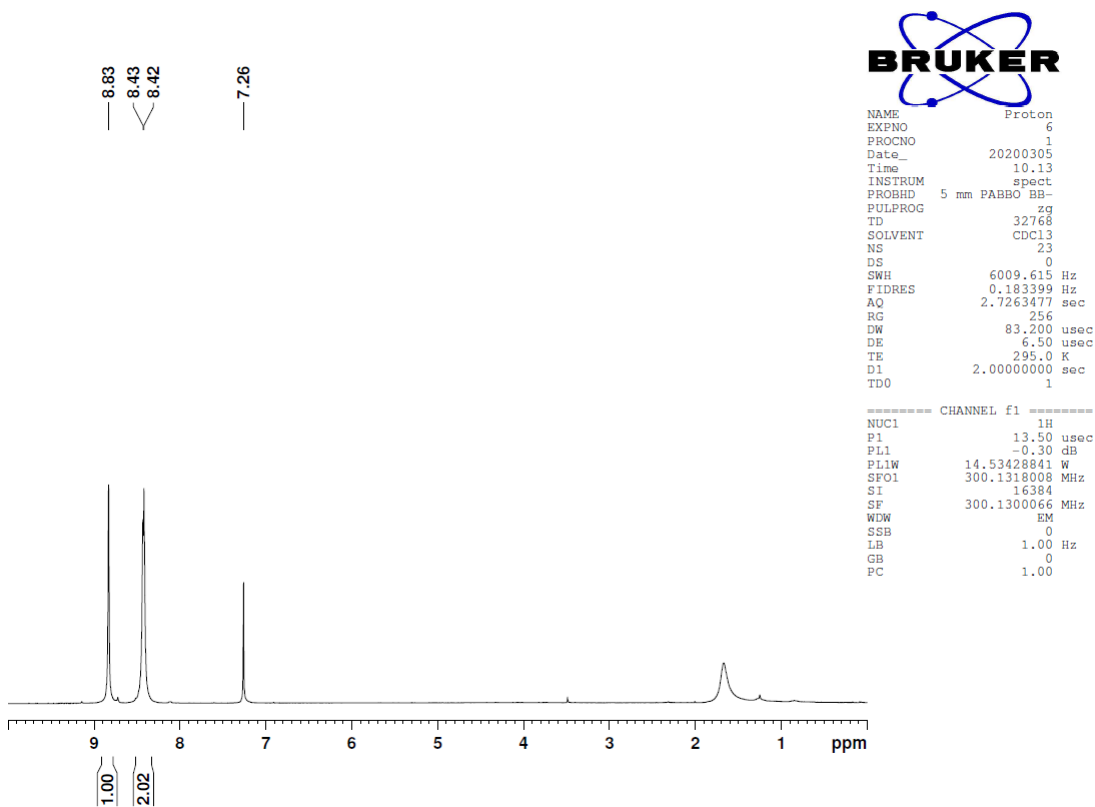

**Fig S8:**  $^1\text{H}$  NMR spectra of bis(2-pyrazinyl)diselenide [(2-pyzSe) $_2$ ] (2)

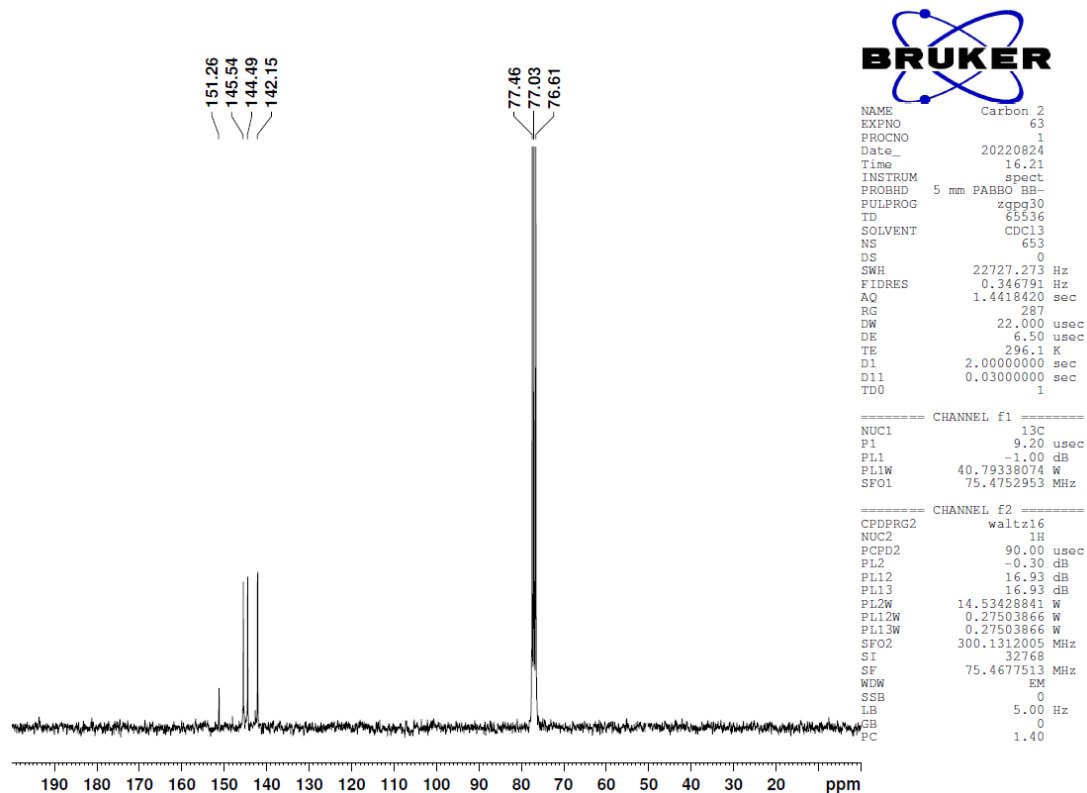

Fig S9:  $^{13}\text{C}\{^1\text{H}\}$  NMR spectra of bis(2-pyrazinyl)diselenide,  $[(2\text{-pyzSe})_2]$  (2)

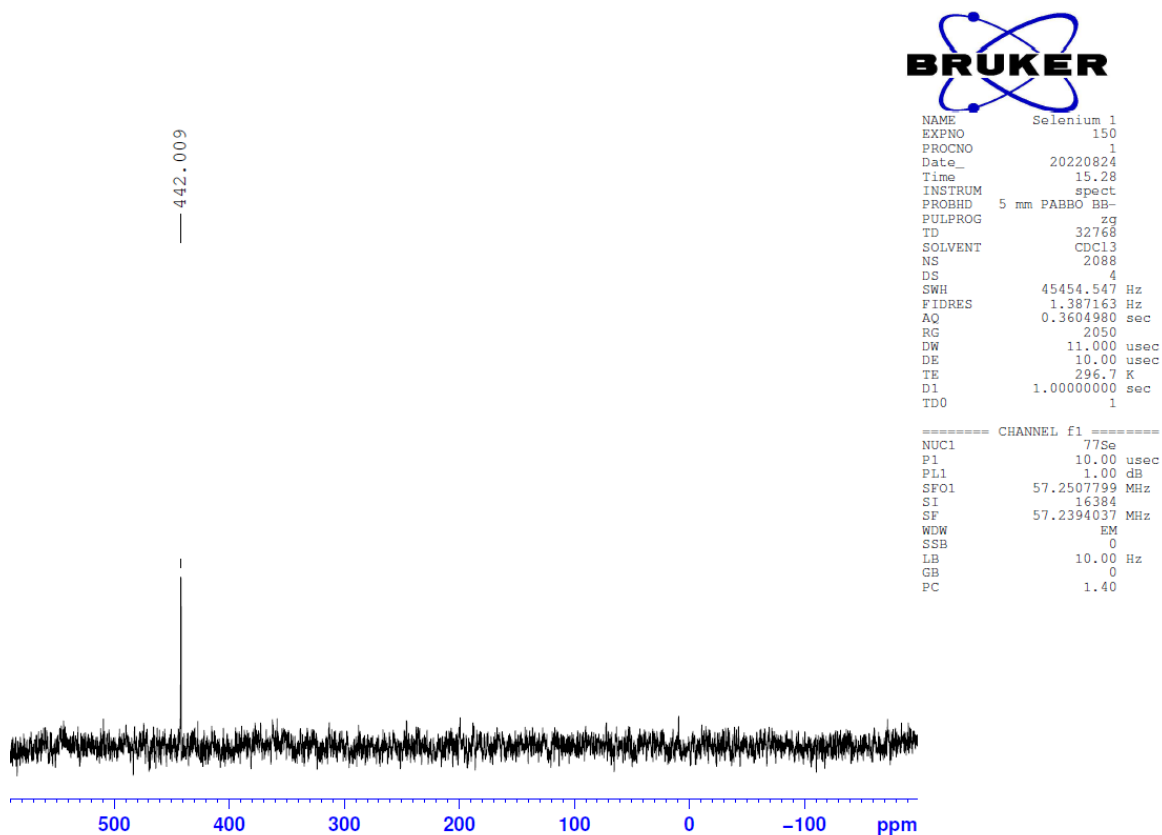

Fig S10:  $^{77}\text{Se}\{^1\text{H}\}$  NMR spectra of bis(2-pyrazinyl)diselenide,  $[(2\text{-pyzSe})_2]$  (2)

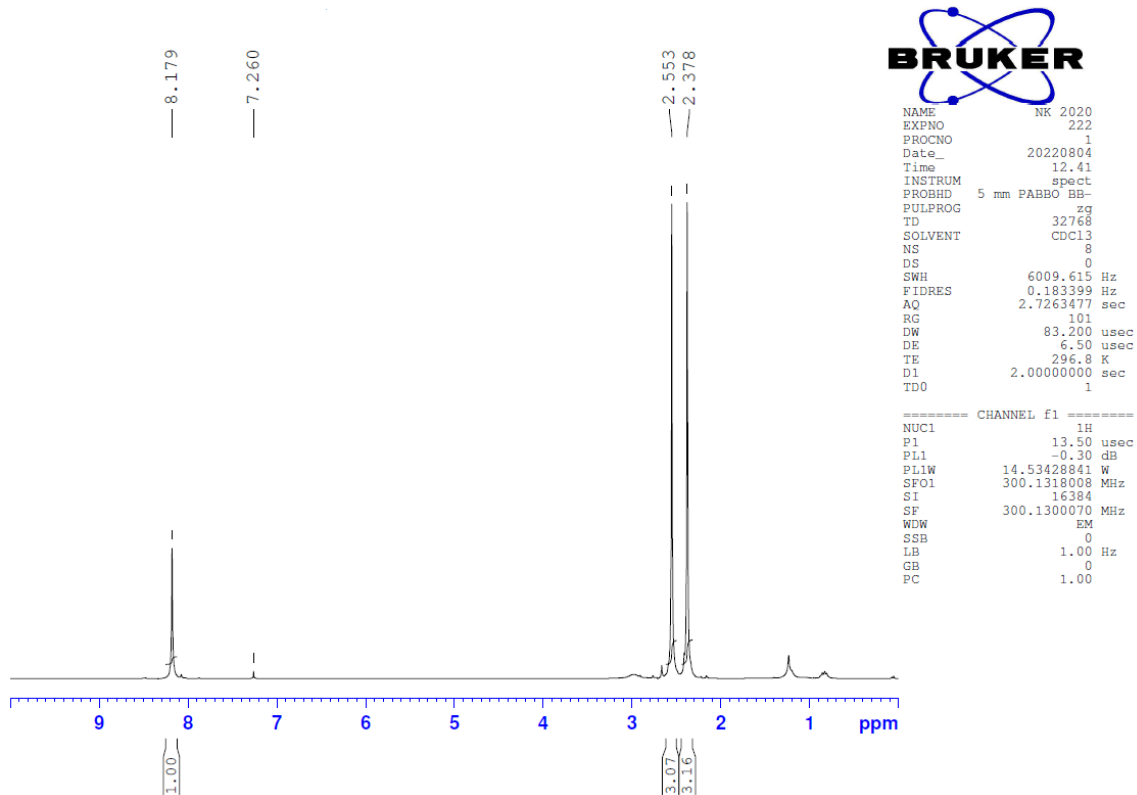

Fig S11:  $^1\text{H}$  NMR spectra of bis(2,5-dimethyl-3-pyrazinyl)selenide,  $[(2,5\text{-Me}_2\text{-3-pyz})_2\text{Se}]$  (3)

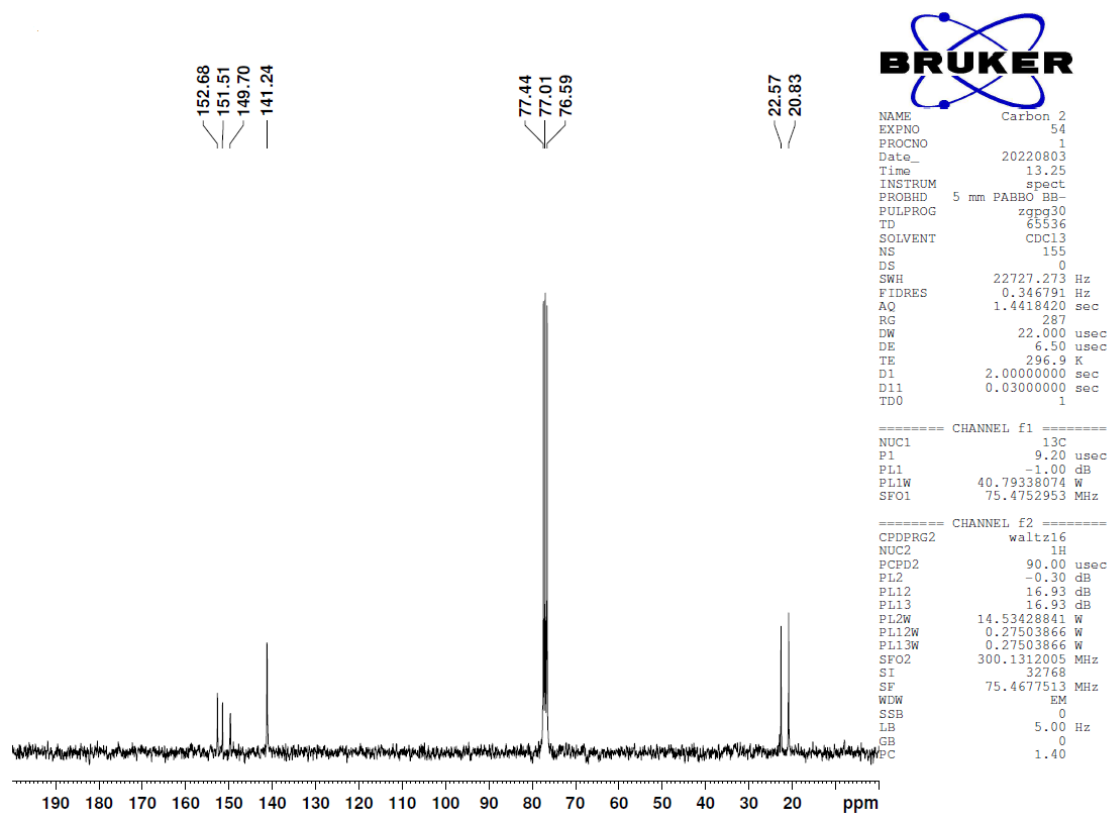

Fig S12:  $^{13}\text{C}\{^1\text{H}\}$  NMR spectra of Bis(2,5-dimethyl-3-pyrazinyl)selenide,  $[(2,5\text{-Me}_2\text{-3-pyz})_2\text{Se}]$  (3)

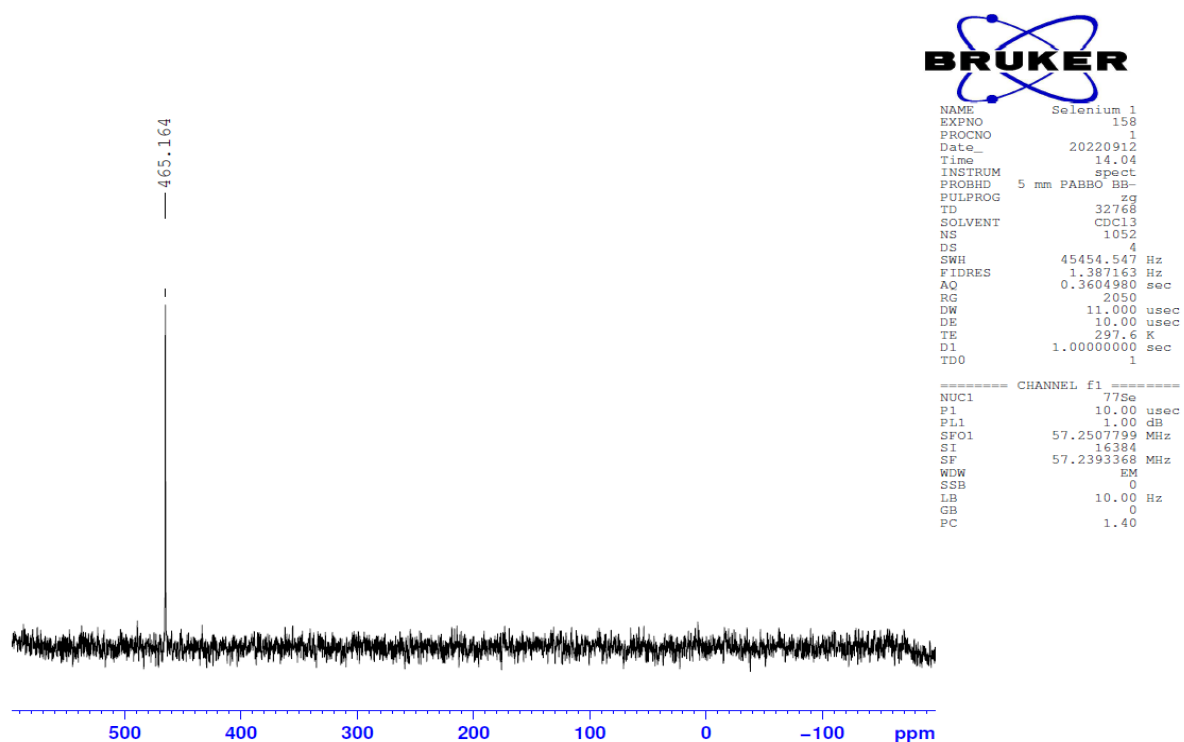

**Fig S13:**  $^{77}\text{Se}\{^1\text{H}\}$  NMR spectra of Bis(2,5-dimethyl-3-pyrazinyl)selenide, [(2,5-Me<sub>2</sub>-3-pyz)<sub>2</sub>Se] (3).

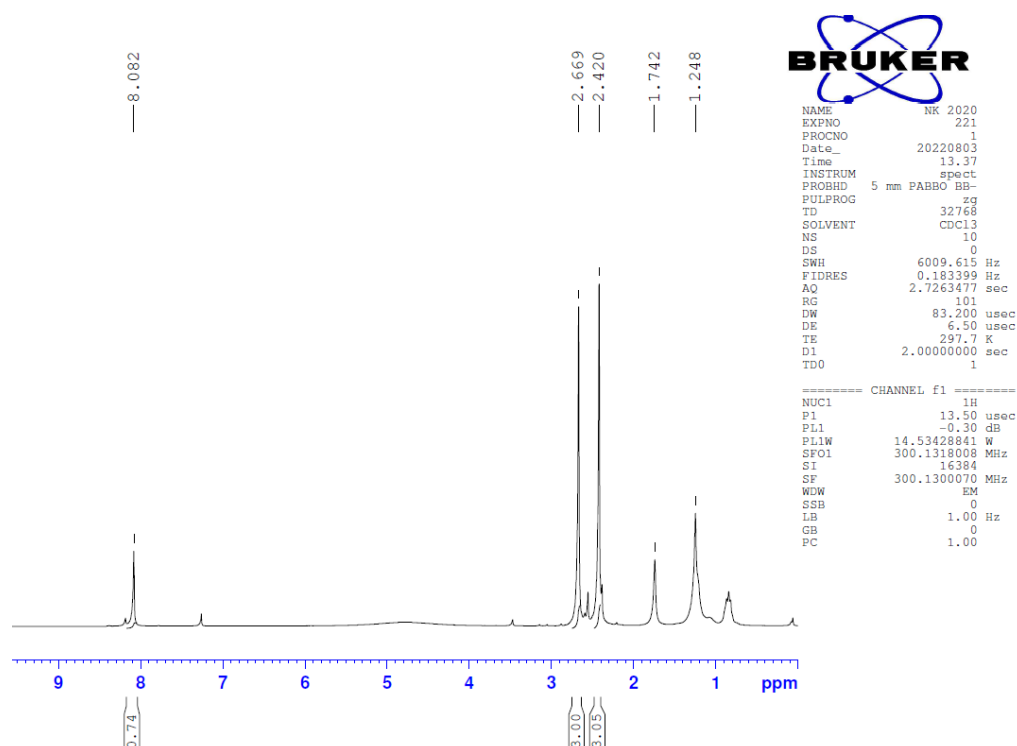

**Fig S14:**  $^1\text{H}$  NMR spectra of Bis(2,5-dimethyl-3-pyrazinyl)diselenide, [(2,5-Me<sub>2</sub>-3-pyzSe)<sub>2</sub>] (4).



(Peaks at 1.24 and 1.74 is due to solvent residual signals) Ref: G. R. Fulmer, A. J. M. Miller, N. H. Sherden, H. E. Gottlieb, A. Nudelman, B. M. Stoltz, J. E. Bercaw and K. I. Goldberg *Organometallics* **29**(2010) 2176–2179.

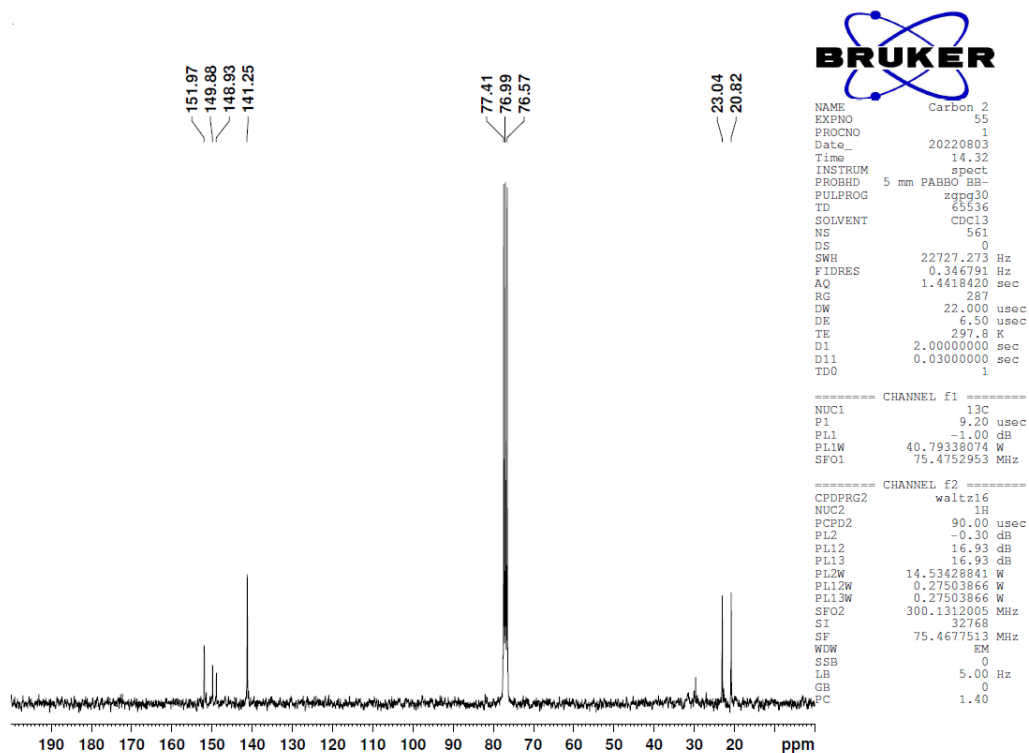

**Fig S15:**  $^{13}\text{C}\{^1\text{H}\}$  NMR spectra of Bis(2,5-dimethyl-3-pyrazinyl)diselenide [(2,5-Me<sub>2</sub>-3-pyzSe)<sub>2</sub>] (**4**)

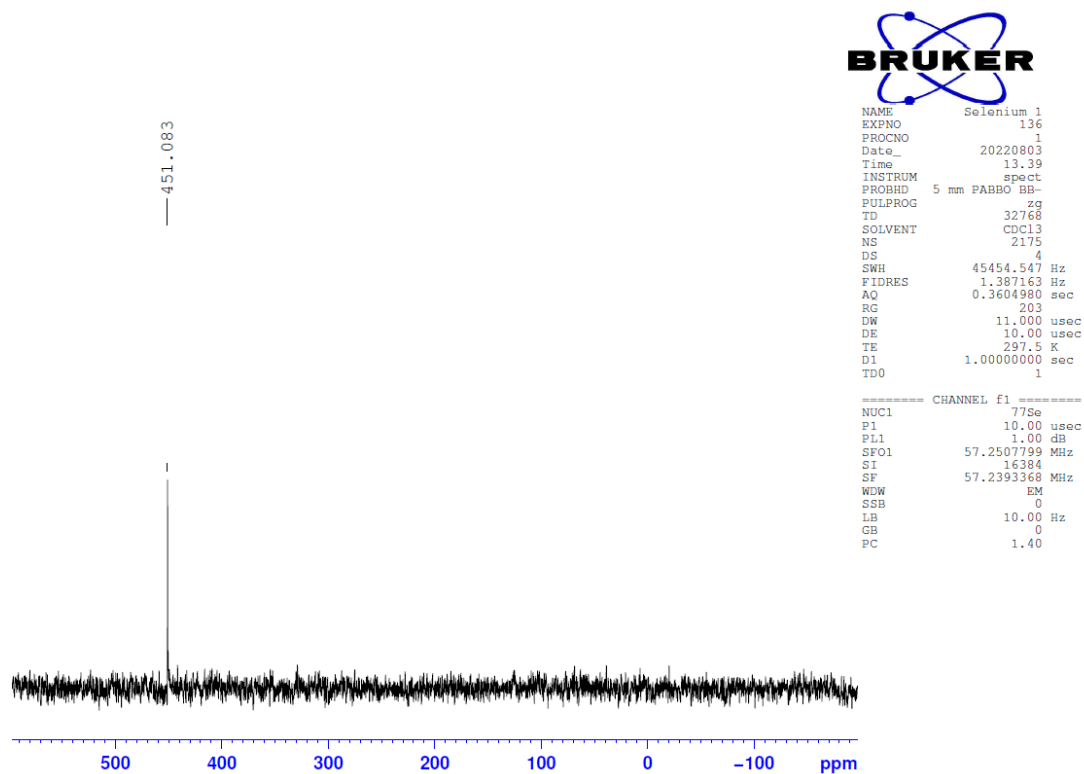

**Fig S16:**  $^{77}\text{Se}\{^1\text{H}\}$  NMR spectra of Bis(2,5-dimethyl-3-pyrazinyl)diselenide [(2,5-Me<sub>2</sub>-3-pyzSe)<sub>2</sub>] (4)

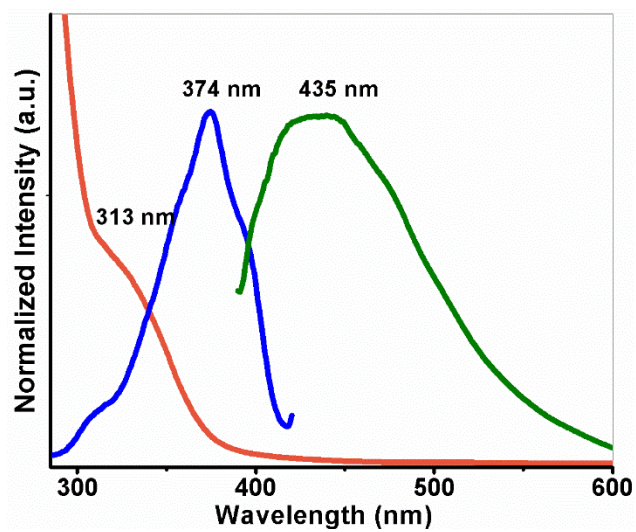

**Fig S17:** Absorption-, excitation-, emission-spectra of [(3-Me-2-pySe)<sub>2</sub>].

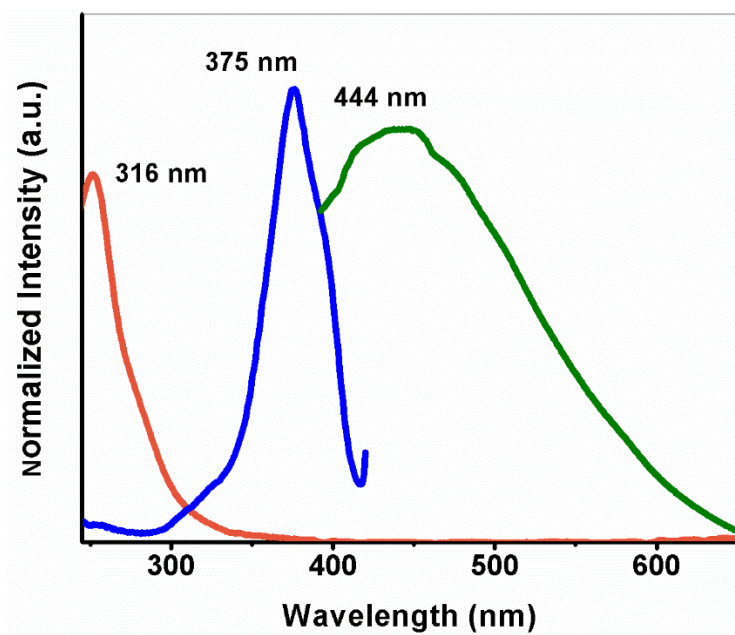

**Fig S18:** Absorption-, excitation-, emission-spectra of [(4,6-Me<sub>2</sub>-2-pymSe)<sub>2</sub>].
